# Supplementary figures and images for: Luminescence thermometry for in situ temperature measurements in microfluidic devices
Source: Royal Society of Chemistry journal article supplement (doi:10.1039/c8lc01292j), 2019-01-01

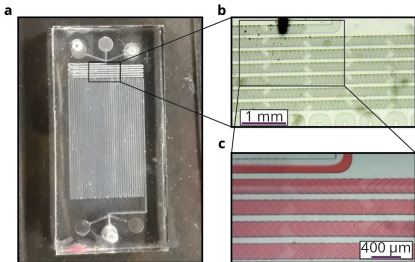

Supplement: c8lc01292j2.pdf [file c8lc01292j2.pdf]
